# Supplementary material for: Uncovering a Silent Crisis: Psychometric Validation and Public Health Implications of Depression and Anxiety Among Caregivers of Patients Undergoing Hemodialysis in Pakistan
Source: Research Square preprint supplement (doi:10.21203/rs.3.rs-7166296/v1), 2025-08-28
Supplement: Supplementary file 1 [file c522b6585a8636811de39c5e.docx]

**Table S1: Frequencies of PHQ-9 items**

| **PHQ-9 Scale Items** | **Not at all** | **Several days** | **More than half of the days** | **Nearly every day** |
| --- | --- | --- | --- | --- |
| **Little interest or pleasure in doing things** | 200 (55.2%) | 127 (35.1%) | 22 (6.1%) | 13 (3.6%) |
| **Feeling down, depressed, or hopeless** | 114 (31.5%) | 196 (54.1%) | 30 (8.3%) | 22 (6.1%) |
| **Trouble falling or staying asleep, or sleeping too much** | 207 (57.2%) | 99 (27.3%) | 27 (7.5%) | 29 (8%) |
| **Feeling tired or having little energy** | 134 (37%) | 170 (47%) | 36 (9.9%) | 22 (6.1%) |
| **Poor appetite or overeating** | 222 (61.3%) | 89 (24.6%) | 32 (8.8%) | 19 (5.2%) |
| **Feeling bad about yourself—or that you are a failure or have let yourself or your family down** | 254 (70.2%) | 79 (21.8%) | 18 (5%) | 11 (3%) |
| **Trouble concentrating on things, such as reading the newspaper or watching television** | 169 (46.7%) | 144 (39.8%) | 30 (8.3%) | 19 (5.2%) |
| **Moving or speaking so slowly that others could have noticed. Or the opposite—being so fidgety or restless that you have been moving around a lot more than usual** | 232 (64.1%) | 92 (25.4%) | 24 (6.6%) | 14 (3.9%) |
| **Thoughts that you would be better off dead, or of hurting yourself** | 297 (82%) | 54 (14.9%) | 7 (1.9%) | 4 (1.1%) |
| **Functional difficulty due to symptoms;** | **Not difficult at all** | **Somewhat difficult** | **Very difficult** | **Extremely difficult** |
| **If you checked off any problems, how difficult have these problems made it for you to do your work, take care of things at home, or get along with other people?** | 179(49.4%) | 148(40.9%) | 25(6.9%) | 10(2.8%) |

**Table S2: Frequencies of GAD-7 items**

| **GAD-7 scale items** | **Not at all** | **Several days** | **More than half the days** | **Nearly every day** |
| --- | --- | --- | --- | --- |
| **Feeling nervous, anxious, or on edge** | 121(33.4) | 207(57.2) | 26(7.2) | 8(2.2) |
| **Not being able to stop or control worrying** | 155(42.8) | 141(39.0) | 47(13.0) | 19(5.2) |
| **Worrying too much about different things** | 117(32.3) | 151(41.7) | 53(14.6) | 41(11.3) |
| **Trouble relaxing** | 127(35.1) | 171(47.2) | 38(10.5) | 26(7.2) |
| **Being so restless that it is hard to sit still** | 186(51.4) | 112(30.9) | 48(13.3) | 16(4.4) |
| **Becoming easily annoyed or irritable** | 162(44.8) | 136(37.6) | 40(11.0) | 24(6.6) |
| **Feeling afraid, as if something awful might happen** | 162(44.8) | 108(29.9) | 48(13.3) | 44(12.2) |

**Table S3: Correlation of depression and anxiety with intensity and duration of caregiving**

| **Variable 1** | **Variable 2** | **Spearman's**  **Rho** | **p value** |
| --- | --- | --- | --- |
| **Intensity of caregiving (daily hours)** | Total depression scores | 0.143 | 0.007 |
|  | Total anxiety score | 0.059 | 0.26 |
| **Duration of caregiving (months)** | Total depression scores | -0.168 | 0.001 |
|  | Total anxiety score | 0.039 | 0.455 |
| **Total depression scores** | Total anxiety score | 0.622 | <0.001 |

**Table S4: Pairwise Comparisons of Depression with Marital status**

| **Sample 1-Sample 2** | **Test Statistic** | **Std. Error** | **Std. Test Statistic** | **Sig.** | **Adj Sig.a** |
| --- | --- | --- | --- | --- | --- |
| **Single-Divorced** | -43.629 | 61.707 | -0.707 | 0.480 | 1.000 |
| **Single-Married** | -51.432 | 14.965 | -3.437 | 0.001 | 0.004 |
| **Single-Widowed** | -196.429 | 48.576 | -4.044 | 0.000 | 0.000 |
| **Divorced-Married** | 7.802 | 60.475 | 0.129 | 0.897 | 1.000 |
| **Divorced-**  **Widowed** | 152.800 | 76.111 | 2.008 | 0.045 | 0.268 |
| **Married-**  **Widowed** | -144.998 | 47.000 | -3.085 | 0.002 | 0.012 |

**Table S5: Pairwise Comparisons of Depression with Education**

| **Sample 1-Sample 2** | **Test Statistic** |  | **Std. Test Statistic** |  | **Adj. Sig.a** |
| --- | --- | --- | --- | --- | --- |
| **Std. Error** | **Sig.** |
| **University- Postgraduate** | 41.425 | 32.374 | 1.28 | 0.201 | 1 |
| **University- Secondary school** | 69.284 | 15.728 | 4.405 | 0 | 0 |
| **University- Elementary** | 93.871 | 19.887 | 4.72 | 0 | 0 |
| **School** |
| **University- Middle school** | 111.013 | 16.907 | 6.566 | 0 | 0 |
| **University-None** | 116.102 | 18.865 | 6.154 | 0 | 0 |
| **Postgraduate- Secondary school** | 27.859 | 31.774 | 0.877 | 0.381 | 1 |
| **Postgraduate- Elementary** | 52.446 | 34.025 | 1.541 | 0.123 | 1 |
| **School** |
| **Postgraduate- Middle school** | 69.588 | 32.374 | 2.15 | 0.032 | 0.474 |
| **Postgraduate-** | 74.676 | 33.438 | 2.233 | 0.026 | 0.383 |
| **None** |
| **Secondary school-** | 24.587 | 18.895 | 1.301 | 0.193 | 1 |
| **Elementary school** |
| **Secondary school- Middle school** | 41.729 | 15.728 | 2.653 | 0.008 | 0.12 |
| **Secondary school- None** | 46.817 | 17.816 | 2.628 | 0.009 | 0.129 |
| **Elementary school-Middle** | -17.142 | 19.887 | -0.862 | 0.389 | 1 |
| **School** |
| **Elementary school-None** | 22.231 | 21.577 | 1.03 | 0.303 | 1 |
| **Middle school- None** | 5.089 | 18.865 | 0.27 | 0.787 | 1 |

**Table S6: Pairwise Comparisons of Depression with Occupation**

| **Sample 1-Sample 2** | **Test Statistic** | **Std. Error** | **Std. Test Statistic** | **Sig.** | **Adj. Sig.a** |
| --- | --- | --- | --- | --- | --- |
| **Employed- Unemployed** | -54.056 | 11.091 | -4.874 | 0.000 | 0.000 |
| **Employed-Retired** | -138.125 | 47.331 | -2.918 | 0.004 | 0.011 |
| **Unemployed- Retired** | -84.069 | 47.196 | -1.781 | 0.075 | 0.225 |

**Table S7: Pairwise Comparisons of Depression with Kinship with the patients**

| **Sample 1-Sample 2** | **Test Statistic** |  | **Std. Test Statistic** |  | **Adj. Sig.a** |
| --- | --- | --- | --- | --- | --- |
| **Std. Error** | **Sig.** |
| **Children-Siblings** | -18.01 | 19.775 | -0.911 | 0.362 | 1 |
| **Children- Extended Family (aunts, uncles,** | -59.357 | 33.465 | -1.774 | 0.076 | 1 |
| **etc)** |
| **Children-Spouse / Partners** | -62.679 | 14.347 | -4.369 | 0 | 0 |
| **Children-Other** | -84.514 | 36.597 | -2.309 | 0.021 | 0.314 |
| **Children-Parents** | -94.545 | 16.96 | -5.575 | 0 | 0 |
| **Siblings-Extended Family (aunts, uncles, etc)** | -41.347 | 35.299 | -1.171 | 0.241 | 1 |
| **Siblings-Spouse / Partners** | 44.67 | 18.221 | 2.452 | 0.014 | 0.213 |
| **Siblings-Other** | -66.504 | 38.281 | -1.737 | 0.082 | 1 |
| **Siblings-Parents** | 76.536 | 20.341 | 3.763 | 0 | 0.003 |
| **Extended Family (aunts, uncles, etc)-Spouse /** | 3.322 | 32.57 | 0.102 | 0.919 | 1 |
| **Partners** |
| **Extended Family (aunts, uncles, etc)-Other** | -25.157 | 46.843 | -0.537 | 0.591 | 1 |
| **Extended Family (aunts, uncles, etc)-Parents** | 35.188 | 33.802 | 1.041 | 0.298 | 1 |
| **Spouse / Partners- Other** | -21.834 | 35.78 | -0.61 | 0.542 | 1 |
| **Spouse / Partners- Parents** | 31.866 | 15.118 | 2.108 | 0.035 | 0.526 |
| **Other-Parents** | 10.032 | 36.905 | 0.272 | 0.786 | 1 |

**Table S8: Pairwise Comparisons of anxiety with Occupation**

| **Sample 1-**  **Sample 2** | **Test Statistic** | **Std. Error** | **Std. Test Statistic** | **Sig.** | **Adj. Sig.a** |
| --- | --- | --- | --- | --- | --- |
| **Employed- Unemployed** | -50.687 | 11.098 | -4.567 | 0.000 | 0.000 |
| **Employed- Retired** | -100.269 | 47.358 | -2.117 | 0.034 | 0.103 |
| **Unemployed- Retired** | -49.582 | 47.223 | -1.050 | 0.294 | 0.881 |

**Table S9: Pairwise Comparisons of Kinship with the patients**

| **Sample 1-Sample 2** | **Test Statistic** | **Std. Error** | **Std. Test Statistic** |  | **Adj. Sig.a** |
| --- | --- | --- | --- | --- | --- |
| **Sig.** |
| **Children- Siblings** | -0.678 | 19.787 | -0.034 | 0.973 | 1 |
| **Children- Extended Family (aunts, uncles, etc)** | -5.862 | 33.484 | -0.175 | 0.861 | 1 |
| **Children- Other** | -40.559 | 36.617 | -1.108 | 0.268 | 1 |
| **Children- Spouse / Partners** | -55.584 | 14.356 | -3.872 | 0 | 0.002 |
| **Children- Parents** | -63.276 | 16.969 | -3.729 | 0 | 0.003 |
| **Siblings- Extended Family (aunts, uncles, etc)** | -5.184 | 35.319 | -0.147 | 0.883 | 1 |
| **Siblings- Other** | -39.881 | 38.303 | -1.041 | 0.298 | 1 |
| **Siblings- Spouse / Partners** | 54.906 | 18.231 | 3.012 | 0.003 | 0.039 |
| **Siblings- Parents** | 62.598 | 20.353 | 3.076 | 0.002 | 0.032 |
| **Extended Family (aunts, uncles, etc)- Other** | -34.697 | 46.87 | -0.74 | 0.459 | 1 |
| **Extended Family (aunts, uncles, etc)- Spouse / Partners** | 49.722 | 32.589 | 1.526 | 0.127 | 1 |
| **Extended Family (aunts, uncles, etc)- Parents** | 57.414 | 33.821 | 1.698 | 0.09 | 1 |
| **Other-Spouse** | 15.025 | 35.801 | 0.42 | 0.675 | 1 |
| **/ Partners** |
| **Other- Parents** | 22.717 | 36.926 | 0.615 | 0.538 | 1 |
| **Spouse / Partners- Parents** | 7.692 | 15.127 | 0.508 | 0.611 | 1 |

**Table S10: Generalized Linear Model of Depression**

|  |  |  | **95% Wald** | |  |
| --- | --- | --- | --- | --- | --- |
|  |  | **Std. Error** | **Confidence Interval** | |
| **Parameter** | **B** |  | **Lower** | **Upper** | **Sig.** |
| **(Intercept)** | 0.814 | 0.9891 | -1.125 | 2.752 | 0.411 |
| **[Gender=1]** | -0.023 | 0.1517 | -0.32 | 0.275 | 0.88 |
| **[Residence=1]** | -0.091 | 0.14 | -0.365 | 0.184 | 0.517 |
| **[Marital status=1]** | 0.307 | 0.6795 | -1.025 | 1.639 | 0.651 |
| **[Marital status=2]** | 0.364 | 0.6633 | -0.936 | 1.664 | 0.584 |
| **[Marital status=3]** | 0.958 | 0.8291 | -0.667 | 2.583 | 0.248 |
| **[Education=1]** | 0.772 | 0.2318 | 0.318 | 1.226 | 0.001 |
| **[Education=2]** | 0.54 | 0.2372 | 0.075 | 1.005 | 0.023 |
| **[Education=3]** | 0.832 | 0.2008 | 0.439 | 1.226 | 0 |
| **[Education=4]** | 0.542 | 0.1847 | 0.18 | 0.904 | 0.003 |
| **[Education=5]** | 0.433 | 0.3613 | -0.275 | 1.141 | 0.231 |
| **[Occupation=1]** | -0.545 | 0.5102 | -1.545 | 0.455 | 0.285 |
| **[Occupation=2]** | -0.197 | 0.5185 | -1.213 | 0.819 | 0.704 |
| **[Kinship with the patients=1]** | -0.187 | 0.4045 | -0.98 | 0.606 | 0.644 |
| **[Kinship with the patients=2]** | 0.242 | 0.4186 | -0.578 | 1.063 | 0.563 |
| **[Kinship with the patients=3]** | 0.097 | 0.4081 | -0.703 | 0.897 | 0.812 |
| **[Kinship with the patients=4]** | -0.259 | 0.4143 | -1.071 | 0.553 | 0.532 |
| **[Kinship with the patients=5]** | 0.251 | 0.5357 | -0.799 | 1.301 | 0.64 |
| **[Living situation=1]** | -0.104 | 0.2588 | -0.611 | 0.403 | 0.688 |
| **Age (years)** | 0.01 | 0.0072 | -0.004 | 0.024 | 0.17 |
| **Intensity of caregiving (daily** | 0.006 | 0.0096 | -0.013 | 0.025 | 0.521 |
| **hours)** |
| **Duration of caregiving (months)** | -0.003 | 0.0014 | -0.006 | -8.486E- | 0.043 |
| 5 |

**Table S11: Generalized Linear Model of Anxiety**

| **Parameter** | **B** | **Std. Error** | **95% Wald**  **Confidence Interval** | |  |
| --- | --- | --- | --- | --- | --- |
| **Lower** | **Upper** | **Sig.** |
| **(Intercept)** | 1.899 | 0.9975 | -0.056 | 3.854 | 0.057 |
| **[Gender=1]** | -0.273 | 0.1505 | -0.568 | 0.023 | 0.070 |
| **[Residence=1]** | -0.111 | 0.1359 | -0.377 | 0.156 | 0.416 |
| **[Marital status=1]** | 0.065 | 0.6667 | -1.241 | 1.372 | 0.922 |
| **[Marital status=2]** | 0.256 | 0.6588 | -1.035 | 1.548 | 0.697 |
| **[Marital status=3]** | 0.478 | 0.8356 | -1.160 | 2.116 | 0.567 |
| **[Education=1]** | -0.028 | 0.2333 | -0.486 | 0.429 | 0.904 |
| **[Education=2]** | -0.036 | 0.2347 | -0.496 | 0.424 | 0.878 |
| **[Education=3]** | 0.218 | 0.1988 | -0.171 | 0.608 | 0.272 |
| **[Education=4]** | 0.161 | 0.1786 | -0.189 | 0.511 | 0.368 |
| **[Education=5]** | -0.426 | 0.3669 | -1.145 | 0.293 | 0.245 |
| **[Occupation=1]** | -0.642 | 0.5151 | -1.652 | 0.367 | 0.212 |
| **[Occupation=2]** | -0.454 | 0.5229 | -1.479 | 0.571 | 0.386 |
| **[Kinship with the patients=1]** | -0.073 | 0.3999 | -0.857 | 0.711 | 0.855 |
| **[Kinship with the patients=2]** | 0.198 | 0.4130 | -0.612 | 1.007 | 0.632 |
| **[Kinship with the patients=3]** | 0.116 | 0.4035 | -0.675 | 0.907 | 0.773 |
| **[Kinship with the patients=4]** | -0.254 | 0.4089 | -1.056 | 0.547 | 0.534 |
| **[Kinship with the patients=5]** | -0.204 | 0.5276 | -1.238 | 0.830 | 0.699 |
| **[Living situation=1]** | -0.068 | 0.2533 | -0.565 | 0.428 | 0.788 |
| **Age (years)** | 0.006 | 0.0074 | -0.008 | 0.021 | 0.391 |
| **Intensity of caregiving (daily**  **hours)** | -0.004 | 0.0094 | -0.023 | 0.014 | 0.631 |
| **Duration of caregiving (months)** | 4.915E-  05 | 0.0014 | -0.003 | 0.003 | 0.972 |

# Table S12: Reliability Analysis- PHQ-9

**Cronbach's α McDonald's ω scale**

0.8639 0.8638

**Table S13: Item Reliability Statistics**

If item dropped Cronbach's α McDonald's ω

| **PHQ_1** | 0.8414 | 0.8409 |
| --- | --- | --- |
| **PHQ_2** | 0.8484 | 0.8487 |
| **PHQ_3** | 0.8418 | 0.8420 |
| **PHQ_4** | 0.8363 | 0.8364 |
| **PHQ_5** | 0.8506 | 0.8507 |
| **PHQ_6** | 0.8490 | 0.8491 |
| **PHQ_7** | 0.8490 | 0.8490 |
| **PHQ_8** | 0.8515 | 0.8517 |
| **PHQ_9** | 0.8721 | 0.8736 |

**Figure S1: Correlation Heatmap**

# Table S14: Exploratory Factor Analysis- PHQ-9

**Table S14: Factor Loadings**

Factor

1 2 Uniqueness

**PHQ_1** 0.7616 0.4301

**PHQ_2** 0.8316 0.4711

**PHQ_3** 0.8176 0.4144

**PHQ_4** 0.7160 0.3877

**PHQ_5** 0.5715 0.6075

**PHQ_6** 0.3035 0.4521 0.5292

**PHQ_7** 0.4458 0.5755

**PHQ_8** 0.5533 0.5132

**PHQ_9** 0.6416 0.7053

*Note.* 'Minimum residual' extraction method was used in combination with a 'promax' rotation

[3]

## Table S15: Factor Statistics Summary

Summary

| **Factor** | **SS Loadings** | **% of Variance C** | **umulative %** |
| --- | --- | --- | --- |
| 1 | 3.228 | 35.87 | 35.87 |
| 2 | 1.138 | 12.64 | 48.51 |

**Table S16: Inter-Factor Correlations**

1 2

**1** — 0.6354

**2** —

## Table S17: Model Fit

Model Fit Measures

| **RMSEA 90% CI** | | |  |  | **Model Test** | |  |
| --- | --- | --- | --- | --- | --- | --- | --- |
| **RMSEA** | **Lower** | **Upper** | **TLI** | **BIC** | **χ²** | **df** | **p** |
| 0.06770 | 0.04551 | 0.09084 | 0.9491 | -61.37 | 50.57 | 19 | <.001 |

## Table S18: Bartlett's Test of Sphericity

| **χ²** | **df** | **p** |
| --- | --- | --- |
| 1215 | 36 | <.001 |

**Table S19: KMO Measure of Sampling Adequacy**

|  | **MSA** |
| --- | --- |
| **Overall** | 0.8934 |
| **PHQ_1** | 0.9000 |
| **PHQ_2** | 0.8882 |
| **PHQ_3** | 0.8837 |
| **PHQ_4** | 0.8889 |
| **PHQ_5** | 0.9175 |
| **PHQ_6** | 0.9124 |
| **PHQ_7** | 0.9018 |
| **PHQ_8** | 0.9056 |
| **PHQ_9** | 0.7573 |

## Figure S2: Eigenvalues

**Scree Plot**

# Table S20: Structural Equation Modelling- PHQ-9

Models Info

Estimation Method DWLS .

Optimization Method NLMINB

Number of observations 362

Free parameters 37

Standard errors Robust

Scaled test Mean adjusted scaled and shifted

Converged TRUE

Iterations 22

Model Endogenous1=~PHQ_1+PHQ_2+PHQ_3+PHQ_4+PHQ_5+PHQ_7 Endogenous2=~PHQ_6+PHQ_8+PHQ_9

*Note.* Variable (PHQ_1,PHQ_2,PHQ_3,PHQ_4,PHQ_5,PHQ_7,PHQ_6,PHQ_8,PHQ_9) has been coerced to ordered type.

[4] [5]

## Table S21: Overall Model Tests

| Model tests |  |  |  |
| --- | --- | --- | --- |
| **Label** | **X²** | **Df** | **p** |
| User Model | 56.86 | 26 | <.001 |
| Baseline Model | 4657.43 | 36 | <.001 |
| Scaled User | 99.90 | 26 | <.001 |
| Scaled Baseline | 2679.28 | 36 | <.001 |

Table S22: Fit Indices

95% Confidence Intervals

| **Type** | **SRMR** | **RMSEA** | **Lower** | **Upper** | **RMSEA p** |
| --- | --- | --- | --- | --- | --- |
| Classical | 0.0623 | 0.0573 | 0.0370 | 0.0777 | 0.255 |
| Robust | 0.0492 | 0.1320 | 0.1034 | 0.1618 | <.001 |
| Scaled | 0.0492 | 0.0887 | 0.0707 | 0.1075 | <.001 |

Table S23: User model versus baseline model

Model

Comparative Fit Index (CFI) 0.9933

Tucker-Lewis Index (TLI) 0.9908 Bentler-Bonett Non-normed Fit Index (NNFI) 0.9908 Relative Noncentrality Index (RNI) 0.9933 Bentler-Bonett Normed Fit Index (NFI) 0.9878 Bollen's Relative Fit Index (RFI) 0.9831

Bollen's Incremental Fit Index (IFI) 0.9933

Parsimony Normed Fit Index (PNFI) 0.7134

## Table S24: Estimates

Measurement model

95% Confidence Intervals

Latent Observed Estimate SE Lower Upper β z p

| **Endogenous1** | **PHQ_1** | 1.0000 | 0.00000 | 1.0000 | 1.0000 | 0.8103 |  |  |
| --- | --- | --- | --- | --- | --- | --- | --- | --- |
|  | **PHQ_2** | 0.8607 | 0.04706 | 0.7685 | 0.9530 | 0.6975 | 18.289 | <.001 |
|  | **PHQ_3** | 1.0166 | 0.04213 | 0.9340 | 1.0992 | 0.8238 | 24.127 | <.001 |
|  | **PHQ_4** | 1.0361 | 0.04144 | 0.9549 | 1.1173 | 0.8396 | 25.002 | <.001 |
|  | **PHQ_5** | 0.9101 | 0.05132 | 0.8095 | 1.0107 | 0.7374 | 17.733 | <.001 |
|  | **PHQ_7** | 0.8888 | 0.05041 | 0.7900 | 0.9876 | 0.7202 | 17.632 | <.001 |
| **Endogenous2** | **PHQ_6** | 1.0000 | 0.00000 | 1.0000 | 1.0000 | 0.8512 |  |  |
|  | **PHQ_8** | 0.9388 | 0.06712 | 0.8073 | 1.0704 | 0.7991 | 13.987 | <.001 |
|  | **PHQ_9** | 0.6014 | 0.07491 | 0.4546 | 0.7482 | 0.5119 | 8.028 | <.001 |

Table S25: Variances and Covariances

95% Confidence Intervals

Variable 1 Variable 2 Estimate SE Lower Upper β z p

| PHQ_1 | PHQ_1 | 0.3434 | 0.00000 | 0.3434 | 0.3434 | 0.3434 |  |  |
| --- | --- | --- | --- | --- | --- | --- | --- | --- |
| PHQ_2 | PHQ_2 | 0.5136 | 0.00000 | 0.5136 | 0.5136 | 0.5136 |  |  |
| PHQ_3 | PHQ_3 | 0.3214 | 0.00000 | 0.3214 | 0.3214 | 0.3214 |  |  |
| PHQ_4 | PHQ_4 | 0.2951 | 0.00000 | 0.2951 | 0.2951 | 0.2951 |  |  |
| PHQ_5 | PHQ_5 | 0.4562 | 0.00000 | 0.4562 | 0.4562 | 0.4562 |  |  |
| PHQ_7 | PHQ_7 | 0.4812 | 0.00000 | 0.4812 | 0.4812 | 0.4812 |  |  |
| PHQ_6 | PHQ_6 | 0.2755 | 0.00000 | 0.2755 | 0.2755 | 0.2755 |  |  |
| PHQ_8 | PHQ_8 | 0.3615 | 0.00000 | 0.3615 | 0.3615 | 0.3615 |  |  |
| PHQ_9 | PHQ_9 | 0.7380 | 0.00000 | 0.7380 | 0.7380 | 0.7380 |  |  |
| Endogenous1 | Endogenous1 | 0.6566 | 0.04104 | 0.5762 | 0.7370 | 1.0000 | 16.00 | <.001 |
| Endogenous2 | Endogenous2 | 0.7245 | 0.06798 | 0.5912 | 0.8577 | 1.0000 | 10.66 | <.001 |
| Endogenous1 | Endogenous2 | 0.5450 | 0.03983 | 0.4669 | 0.6230 | 0.7901 | 13.68 | <.001 |

Table S26: Intercepts

|  |  |  |  |  |  |  |
| --- | --- | --- | --- | --- | --- | --- |
|  |  |  | **95% Confidence** | **Intervals** |  |  |
| **Variable** | **Intercept** | **SE** | **Lower** | **Upper** | **z** | **p** |
| PHQ_1 | 0.0000 | 0.0000 | 0.0000 | 0.0000 |  |  |
| PHQ_2 | 0.0000 | 0.0000 | 0.0000 | 0.0000 |  |  |
| PHQ_3 | 0.0000 | 0.0000 | 0.0000 | 0.0000 |  |  |
| PHQ_4 | 0.0000 | 0.0000 | 0.0000 | 0.0000 |  |  |
| PHQ_5 | 0.0000 | 0.0000 | 0.0000 | 0.0000 |  |  |
| PHQ_7 | 0.0000 | 0.0000 | 0.0000 | 0.0000 |  |  |
| PHQ_6 | 0.0000 | 0.0000 | 0.0000 | 0.0000 |  |  |
| PHQ_8 | 0.0000 | 0.0000 | 0.0000 | 0.0000 |  |  |
| PHQ_9 | 0.0000 | 0.0000 | 0.0000 | 0.0000 |  |  |
| Endogenous1 | 0.0000 | 0.0000 | 0.0000 | 0.0000 |  |  |
| Endogenous2 | 0.0000 | 0.0000 | 0.0000 | 0.0000 |  |  |

**Table S26: Thresholds**

95% Confidence Intervals

| **Variable** | **Step** | **Thresholds** | **SE** | **Lower** | **Upper** | **z** | **p** |
| --- | --- | --- | --- | --- | --- | --- | --- |
| PHQ_1 | t1 | 0.1319 | 0.0662 | 0.0022 | 0.2616 | 1.9939 | 0.046 |
| PHQ_1 | t2 | 1.3007 | 0.0908 | 1.1226 | 1.4787 | 14.3177 | <.001 |
| PHQ_1 | t3 | 1.8002 | 0.1241 | 1.5570 | 2.0435 | 14.5069 | <.001 |
| PHQ_2 | t1 | -0.4820 | 0.0688 | -0.6169 | -0.3471 | -7.0027 | <.001 |
| PHQ_2 | t2 | 1.0641 | 0.0815 | 0.9043 | 1.2238 | 13.0556 | <.001 |
| PHQ_2 | t3 | 1.5483 | 0.1045 | 1.3435 | 1.7531 | 14.8156 | <.001 |
| PHQ_3 | t1 | 0.1810 | 0.0664 | 0.0510 | 0.3111 | 2.7279 | 0.006 |
| PHQ_3 | t2 | 1.0165 | 0.0800 | 0.8598 | 1.1732 | 12.7102 | <.001 |
| PHQ_3 | t3 | 1.4043 | 0.0960 | 1.2162 | 1.5925 | 14.6277 | <.001 |
| PHQ_4 | t1 | -0.3314 | 0.0673 | -0.4633 | -0.1995 | -4.9246 | <.001 |
| PHQ_4 | t2 | 0.9936 | 0.0793 | 0.8382 | 1.1489 | 12.5330 | <.001 |
| PHQ_4 | t3 | 1.5483 | 0.1045 | 1.3435 | 1.7531 | 14.8156 | <.001 |
| PHQ_5 | t1 | 0.2878 | 0.0670 | 0.1566 | 0.4191 | 4.2980 | <.001 |
| PHQ_5 | t2 | 1.0764 | 0.0819 | 0.9158 | 1.2369 | 13.1398 | <.001 |
| PHQ_5 | t3 | 1.6212 | 0.1095 | 1.4066 | 1.8358 | 14.8066 | <.001 |
| PHQ_7 | t1 | -0.0832 | 0.0660 | -0.2126 | 0.0463 | -1.2595 | 0.208 |
| PHQ_7 | t2 | 1.1014 | 0.0828 | 0.9392 | 1.2637 | 13.3054 | <.001 |
| PHQ_7 | t3 | 1.6212 | 0.1095 | 1.4066 | 1.8358 | 14.8066 | <.001 |
| PHQ_6 | t1 | 0.5292 | 0.0694 | 0.3931 | 0.6653 | 7.6214 | <.001 |
| PHQ_6 | t2 | 1.4043 | 0.0960 | 1.2162 | 1.5925 | 14.6277 | <.001 |
| PHQ_6 | t3 | 1.8751 | 0.1314 | 1.6177 | 2.1326 | 14.2736 | <.001 |
| PHQ_8 | t1 | 0.3608 | 0.0675 | 0.2284 | 0.4932 | 5.3417 | <.001 |
| PHQ_8 | t2 | 1.2537 | 0.0887 | 1.0798 | 1.4276 | 14.1284 | <.001 |
| PHQ_8 | t3 | 1.7663 | 0.1210 | 1.5291 | 2.0035 | 14.5926 | <.001 |
| PHQ_9 | t1 | 0.9171 | 0.0771 | 0.7659 | 1.0682 | 11.8936 | <.001 |
| PHQ_9 | t2 | 1.8751 | 0.1314 | 1.6177 | 2.1326 | 14.2736 | <.001 |
| PHQ_9 | t3 | 2.2887 | 0.1892 | 1.9178 | 2.6595 | 12.0942 | <.001 |

## Figure S3: Path Diagrams

[6]

# Table S27: Reliability Analysis- GAD-7

**Cronbach's α McDonald's ω scale**

0.8516 0.8574

Table S28: Item Reliability Statistics

If item dropped Cronbach's α McDonald's ω

| **GAD_1** | 0.8412 | 0.8479 |
| --- | --- | --- |
| **GAD_2** | 0.8117 | 0.8175 |
| **GAD_3** | 0.8209 | 0.8299 |
| **GAD_4** | 0.8388 | 0.8448 |
| **GAD_5** | 0.8167 | 0.8247 |
| **GAD_6** | 0.8415 | 0.8489 |
| **GAD_7** | 0.8434 | 0.8473 |

**Figure S4: Correlation Heatmap**

# Table S29: Principal Component Analysis-GAD-7

Component Loadings

|  | **Component** |  |
| --- | --- | --- |
|  | **1** | **Uniqueness** |
| **GAD_1** | 0.6659 | 0.5566 |
| **GAD_2** | 0.8391 | 0.2960 |
| **GAD_3** | 0.7824 | 0.3879 |
| **GAD_4** | 0.6889 | 0.5254 |
| **GAD_5** | 0.8084 | 0.3465 |
| **GAD_6** | 0.6577 | 0.5675 |
| **GAD_7** | 0.6707 | 0.5501 |

*Note.* 'promax' rotation was used

[3]

## Table S30: Component Statistics

Summary

Component SS Loadings % of Variance Cumulative %

1 3.770 53.86 53.86

## Table S32: Bartlett's Test of Sphericity

| **χ²** | **df** | **p** |
| --- | --- | --- |
| 971.6 | 21 | <.001 |

Table S33: KMO Measure of Sampling Adequacy

|  | **MSA** |
| --- | --- |
| **Overall** | 0.8746 |
| **GAD_1** | 0.8849 |
| **GAD_2** | 0.8763 |
| **GAD_3** | 0.8908 |
| **GAD_4** | 0.8636 |
| **GAD_5** | 0.8544 |
| **GAD_6** | 0.8899 |
| **GAD_7** | 0.8687 |

## Table S34: Eigenvalues

Initial Eigenvalues

| **Compone** | **nt Eigenvalue** | **% of Variance** | **Cumulative %** |
| --- | --- | --- | --- |
| 1 | 3.7700 | 53.857 | 53.86 |
| 2 | 0.8015 | 11.450 | 65.31 |
| 3 | 0.7554 | 10.791 | 76.10 |
| 4 | 0.4891 | 6.987 | 83.08 |
| 5 | 0.4648 | 6.640 | 89.72 |
| 6 | 0.4014 | 5.734 | 95.46 |
| 7 | 0.3179 | 4.541 | 100.00 |

**Figure S5: Scree Plot**

# Table S35: Exploratory Factor Analysis-GAD-7

Factor Loadings

| **Factor** |  |  |
| --- | --- | --- |
| **1** | **Uniqueness** |  |
| **GAD_1** | 0.5925 | 0.6489 |
| **GAD_2** | 0.8255 | 0.3185 |
| **GAD_3** | 0.7384 | 0.4547 |
| **GAD_4** | 0.6216 | 0.6136 |
| **GAD_5** | 0.7770 | 0.3963 |
| **GAD_6** | 0.5849 | 0.6579 |
| **GAD_7** | 0.5978 | 0.6426 |

*Note.* 'Principal axis factoring' extraction method was used in combination with a 'promax' rotation

[3]

## Table S36: Factor Statistics

Factor SS Loadings % of Variance Cumulative %

1 3.267 46.68 46.68

## Table S37: Model Fit

RMSEA 90% CI Model Test

| **RMSEA** | **Lower** | **Upper** | **TLI** | **BIC** | **χ²** | **df** | **p** |
| --- | --- | --- | --- | --- | --- | --- | --- |
| 0.09709 | 0.07326 | 0.1227 | 0.9244 | -20.67 | 61.81 | 14 | <.001 |

## Table S38: Eigenvalues

Initial Eigenvalues

| **Factor** | **Eigenvalue** |
| --- | --- |
| 1 | 3.267485 |
| 2 | 0.211637 |
| 3 | 0.122837 |
| 4 | -0.003533 |
| 5 | -0.025953 |
| 6 | -0.120597 |
| 7 | -0.184955 |

**Figure S6: Scree Plot**

# Table S39: Structural Equation Modelling-GAD-7

Models Info

Estimation Method DWLS .

Optimization Method NLMINB Number of observations 362

Free parameters 28

Standard errors Robust

Scaled test Mean adjusted scaled and shifted

Converged TRUE

Iterations 18

Model Endogenous1=~GAD_1+GAD_2+GAD_3+GAD_4+GAD_5+GAD_6+GAD_7

*Note.* Variable (GAD_1,GAD_2,GAD_3,GAD_4,GAD_5,GAD_6,GAD_7) has been coerced to ordered type.

[4] [5]

## Table S40: Model Tests

|  |  |  |  |
| --- | --- | --- | --- |
| **Label** | **X²** | **df** | **p** |
| User Model | 28.07 | 14 | 0.014 |
| Baseline Model | 3800.42 | 21 | <.001 |
| Scaled User | 51.94 | 14 | <.001 |
| Scaled Baseline | 2558.01 | 21 | <.001 |

**Table S41: Fit Statistics**

95% Confidence Intervals

| **Type** | **SRMR** | **RMSEA** | **Lower** | **Upper** | **RMSEA p** |
| --- | --- | --- | --- | --- | --- |
| Classical | 0.0508 | 0.0528 | 0.0231 | 0.0810 | 0.398 |
| Robust | 0.0384 | 0.1313 | 0.0971 | 0.1675 | <.001 |
| Scaled | 0.0384 | 0.0866 | 0.0622 | 0.1124 | 0.008 |

Table S42: User model versus baseline model

Model

Comparative Fit Index (CFI) 0.9963

Tucker-Lewis Index (TLI) 0.9944

Bentler-Bonett Non-normed Fit Index (NNFI) 0.9944

Relative Noncentrality Index (RNI) 0.9963

Bentler-Bonett Normed Fit Index (NFI) 0.9926

Bollen's Relative Fit Index (RFI) 0.9889

Bollen's Incremental Fit Index (IFI) 0.9963

Parsimony Normed Fit Index (PNFI) 0.6617

## Table S43: Estimates

Measurement model

95% Confidence Intervals

| **Latent Observed** | | **Estimate** | **SE** | **Lower** | **Upper** | **β** | **z** | **p** |
| --- | --- | --- | --- | --- | --- | --- | --- | --- |
| **Endogenous1 GAD_1** | | 1.0000 | 0.00000 | 1.0000 | 1.000 | 0.6774 |  |  |
|  | **GAD_2** | 1.2944 | 0.07373 | 1.1499 | 1.439 | 0.8768 | 17.56 | <.001 |
|  | **GAD_3** | 1.1656 | 0.06903 | 1.0303 | 1.301 | 0.7895 | 16.88 | <.001 |
|  | **GAD_4** | 1.0555 | 0.07012 | 0.9181 | 1.193 | 0.7150 | 15.05 | <.001 |
|  | **GAD_5** | 1.2560 | 0.07197 | 1.1149 | 1.397 | 0.8508 | 17.45 | <.001 |
|  | **GAD_6** | 0.9436 | 0.07835 | 0.7900 | 1.097 | 0.6392 | 12.04 | <.001 |
|  | **GAD_7** | 0.9519 | 0.06846 | 0.8178 | 1.086 | 0.6448 | 13.91 | <.001 |
| **Table S44: Variances and Covariances** | | | | | | | | |
| **95% Confidence Intervals**  **Variable 1 Variable 2 Estimate SE Lower Upper β z p** | | | | | | | | |
| GAD_1 | GAD_1 | 0.5412 | 0.00000 | 0.5412 | 0.5412 | 0.5412 |  |  |
| GAD_2 | GAD_2 | 0.2313 | 0.00000 | 0.2313 | 0.2313 | 0.2313 |  |  |
| GAD_3 | GAD_3 | 0.3766 | 0.00000 | 0.3766 | 0.3766 | 0.3766 |  |  |
| GAD_4 | GAD_4 | 0.4888 | 0.00000 | 0.4888 | 0.4888 | 0.4888 |  |  |
| GAD_5 | GAD_5 | 0.2762 | 0.00000 | 0.2762 | 0.2762 | 0.2762 |  |  |
| GAD_6 | GAD_6 | 0.5914 | 0.00000 | 0.5914 | 0.5914 | 0.5914 |  |  |
| GAD_7 | GAD_7 | 0.5842 | 0.00000 | 0.5842 | 0.5842 | 0.5842 |  |  |
| Endogenous1 | Endogenous1 | 0.4588 | 0.04776 | 0.3652 | 0.5524 | 1.0000 | 9.607 | <.001 |

**Table S45: Intercepts**

|  |  |  |  |  |  |  |
| --- | --- | --- | --- | --- | --- | --- |
|  |  |  | **95% Confidence** | **Intervals** |  |  |
| **Variable** | **Intercept** | **SE** | **Lower** | **Upper** | **z** | **p** |
| GAD_1 | 0.0000 | 0.0000 | 0.0000 | 0.0000 |  |  |
| GAD_2 | 0.0000 | 0.0000 | 0.0000 | 0.0000 |  |  |
| GAD_3 | 0.0000 | 0.0000 | 0.0000 | 0.0000 |  |  |
| GAD_4 | 0.0000 | 0.0000 | 0.0000 | 0.0000 |  |  |
| GAD_5 | 0.0000 | 0.0000 | 0.0000 | 0.0000 |  |  |
| GAD_6 | 0.0000 | 0.0000 | 0.0000 | 0.0000 |  |  |
| GAD_7 | 0.0000 | 0.0000 | 0.0000 | 0.0000 |  |  |
| Endogenous1 | 0.0000 | 0.0000 | 0.0000 | 0.0000 |  |  |

Table S46: Thresholds

95% Confidence Intervals

| **Variable** | **Step** | **Thresholds** | **SE** | **Lower** | **Upper** | **z** | **P** |
| --- | --- | --- | --- | --- | --- | --- | --- |
| GAD_1 | t1 | -0.4282 | 0.0682 | -0.5619 | -0.2945 | -6.2777 | <.001 |
| GAD_1 | t2 | 1.3170 | 0.0916 | 1.1374 | 1.4965 | 14.3763 | <.001 |
| GAD_1 | t3 | 2.0122 | 0.1469 | 1.7244 | 2.3000 | 13.7018 | <.001 |
| GAD_2 | t1 | -0.1810 | 0.0664 | -0.3111 | -0.0510 | -2.7279 | 0.006 |
| GAD_2 | t2 | 0.9066 | 0.0768 | 0.7560 | 1.0571 | 11.8002 | <.001 |
| GAD_2 | t3 | 1.6212 | 0.1095 | 1.4066 | 1.8358 | 14.8066 | <.001 |
| GAD_3 | t1 | -0.4588 | 0.0685 | -0.5931 | -0.3244 | -6.6923 | <.001 |
| GAD_3 | t2 | 0.6444 | 0.0712 | 0.5048 | 0.7839 | 9.0513 | <.001 |
| GAD_3 | t3 | 1.2094 | 0.0869 | 1.0391 | 1.3796 | 13.9217 | <.001 |
| GAD_4 | t1 | -0.3831 | 0.0678 | -0.5159 | -0.2503 | -5.6541 | <.001 |
| GAD_4 | t2 | 0.9276 | 0.0774 | 0.7760 | 1.0793 | 11.9866 | <.001 |
| GAD_4 | t3 | 1.4623 | 0.0992 | 1.2679 | 1.6568 | 14.7369 | <.001 |
| GAD_5 | t1 | 0.0346 | 0.0660 | -0.0947 | 0.1639 | 0.5249 | 0.600 |
| GAD_5 | t2 | 0.9276 | 0.0774 | 0.7760 | 1.0793 | 11.9866 | <.001 |
| GAD_5 | t3 | 1.7039 | 0.1158 | 1.4770 | 1.9309 | 14.7155 | <.001 |
| GAD_6 | t1 | -0.1319 | 0.0662 | -0.2616 | -0.0022 | -1.9939 | 0.046 |
| GAD_6 | t2 | 0.9276 | 0.0774 | 0.7760 | 1.0793 | 11.9866 | <.001 |
| GAD_6 | t3 | 1.5039 | 0.1017 | 1.3046 | 1.7033 | 14.7872 | <.001 |
| GAD_7 | t1 | -0.1319 | 0.0662 | -0.2616 | -0.0022 | -1.9939 | 0.046 |
| GAD_7 | t2 | 0.6615 | 0.0715 | 0.5214 | 0.8016 | 9.2536 | <.001 |
| GAD_7 | t3 | 1.1673 | 0.0852 | 1.0003 | 1.3343 | 13.7004 | <.001 |

**Figure S7: Path diagrams**
